# Supplementary material
Source: HighWire-hosted journal article supplement (http://ajnr-stage2.highwire.org/highwire/filestream/182822/field_highwire_adjunct_files/0/19-00400.pdf)

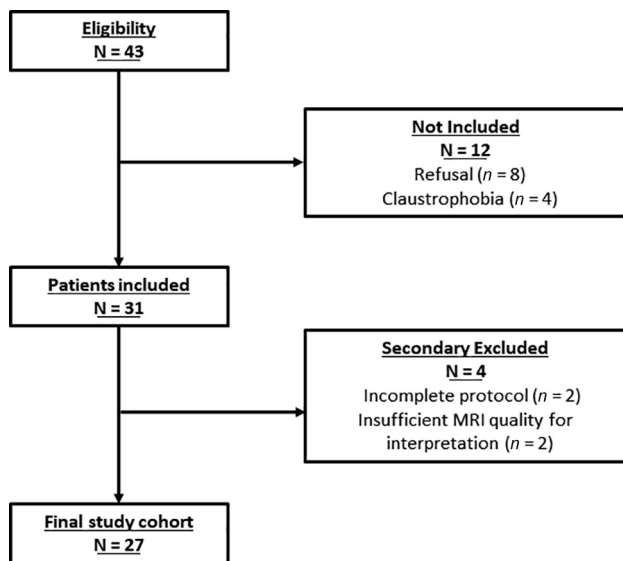

**ON-LINE FIGURE.** Flowchart for the selection of patients.

Supplement: 19-00400.pdf [file 19-00400.pdf]
